# Supplementary material
Source: Research Square preprint supplement (doi:10.21203/rs.3.rs-8836310/v1)
Supplement: Supplementary file 1 [file a2bbc0cc4fe06403775c3e32.docx]

**Appendix**

**SOT-RM: Equivariant shortcut and optimal transportation-based model for exploring chemical reactions mechanisms**

Mingyuan Xu1*, Bowen Li2, Zhaojia Dong3, Pavlo O. Dral4,5,6, Tong Zhu2,7,8*, Hongming Chen1*

*1Guangzhou National Laboratory, Guangzhou 510005, China*

*2Shanghai Engineering Research Center of Molecular Therapeutics & New Drug Development, School of Chemistry and Molecular Engineering, East China Normal University, Shanghai, 200062, China*

*3Institute of Atomic and Molecular Physics, Sichuan University, Chengdu 610065, China*

*4State Key Laboratory of Physical Chemistry of Solid Surfaces, Fujian Provincial Key Laboratory of Theoretical and Computational Chemistry, Department of Chemistry, and College of Chemistry and Chemical Engineering, Xiamen University, Xiamen 361005, China*

*5Institute of Physics, Faculty of Physics, Astronomy, and Informatics, Nicolaus Copernicus University in Toruń, ul. Grudziądzka 5, 87-100 Toruń, Poland*

*6Aitomistic, Shenzhen, China*

*7AI for Science Institute, Beijing 100080, China*

*8Shanghai Innovation Institute, Shanghai 200003, China*

**Correspondence e-mail: mingyuan.xu.sci@gmail.com; tzhu@lps.ecnu.edu.cn; chen_hongming@gzlab.ac.cn.*

**A1. Datasets for pretraining, finetuning and generalization test.**

**RGD1-XTB for SOT-RM pretraining.** RGD1-XTB44 datasets we used consists of elementary reactions computed with low-cost semi-empirical quantum chemistry methods (that is, GFN2-xTB48)。Compared to conventional density functional theory (DFT) datasets (such as Transition1x), RGD1‑XTB44 covers a broader chemical space and includes multiple reaction types, such as complex multi‑reactant/multi‑product pathways. Constructed from PubChem reactants and generalized enumeration rules, all reactions involve only four elements (C, H, O, N) with heavy‑atom counts up to 10. Unlike the version reported in React‑OT38, which comprises 760,615 elementary reactions with optimized structures and reaction‑path calculations, the publicly available version we obtained includes 526,905 elementary reactions along with their intrinsic reaction coordinate (IRC) trajectories. For dataset partitioning, we selected 14,068 randomly chosen reactions that pass the RGD1 filtering criteria as the test set (approximately 10% of the reaction IDs covered in RGD1, totaling 28,445 reactant–product conformation pairs along with their corresponding TS and reaction paths). The remaining reactions were randomly split into training and validation sets in a 9:1 ratio. For the transition‑state prediction task, each triplet of reactant, TS, and product was used for training. For the reaction‑path generation task, we uniformly sampled 10 structures (including the endpoints) from each IRC trajectory to represent the reaction path.

**Transition1x for finetune and evaluation.** Transition1x dataset contains 10,073 elementary reactions optimized using the climbing image NEB method57 at b97x/6-31G(d) level. The reaction system includes up to seven heavy atoms, carbon (C), nitrogen (N), and oxygen (O), with the number of atoms less than 23. Each reaction encompasses reactants, products, DFT-calculated TS structure and energy, and a converged reaction path, also known as the minimal energy path (MEP). For the transition-state generation task, the test set is kept identical to that used in OA‑ReactDiff58, consisting of 1,073 randomly selected elementary reactions, then we strictly followed the established protocol by partitioning the remained data into training, validation sets in an 8:1 ratio. For reaction-path generation, we maintained the same dataset split as used for transition-state prediction. However, because some reaction paths contained fewer than 10 structures (including endpoints), such reactions were excluded during path-generation training. As a result, there are 7518, 940, and 1007 reactions in the final training, validation and test sets.

**Transition1+ for generalization test.** Transition1+ dataset contains 7039 elementary reactions optimized using the climbing image NEB method at b97xd/def2tzvp level. Similar to Transition1x, the reaction system also includes up to seven heavy atoms， but contains carbon (C), nitrogen (N), and oxygen (O), with the number of atoms less than 23. Similar to Transition1x, the Transition1+ dataset also contains reaction systems with at most 7 heavy atoms, but it encompasses a broader variety of reaction types. While 85% of the reactions belong to categories already present in Transition1x, the remaining 15% consist of entirely unseen reaction types—such as R2‑P1, R2‑P2, and others—thereby providing a rigorous benchmark for evaluating the generalization capability of SOT-RM on out‑of‑distribution reactions.

**A2. Model architecture of TSNet for TS prediction .**

TSNet is a denoising model  designed to predict transition-state (TS) geometries and properties in a SE(3)-equivariant manner. As illustrated in Fig. 1g, the model takes as input the hypergraph , noisy coordinates , normalized time , step size , atom count , and atom mask . Atom features and time parameters are embedded and concatenated before being processed by the main network. To fully leverage structural information from reactants and products, the user may optionally provide reactant coordinates  and product coordinates  together with the noisy TS coordinates  as an extended coordinate input , or simply input . The coordinate information is expanded into multiple coordinate sets via a linear projection to enhance geometric feature extraction:

where  is batch size,  is the number of coordinate sets, and  is the number of atoms.

The core of TSNet consists of multiple stacked **Equivariant Graph Attention Layers (EquiGA Layers)**, which is first proposed in SEMLAFLOW47. each comprising five key components (Fig. 1e):

**Node feedforward module.** Each layer first applies a node feedforward module that updates both node features and coordinates in parallel.

**Invariant MLP** updates node features  while preserving translational and rotational invariance. It computes atom-to-origin distances from each coordinate set:

concatenates them with the node features, and processes through a multilayer perceptron:

**Equivariant MLP** updates the coordinate sets  in an SE(3)-equivariant manner. Node features are projected to match the number of coordinate sets, followed by an outer product with the projected coordinates:

where  and  are linear projections of  and , respectively.

**Edge messages module.** Subsequently, the **edge messages module** generates a message tensor  based on coordinate dot products and pairwise node features:

where  denotes optional incoming edge features.

**Attention-based updates.** The message tensor  is then split into two parts: one for coordinate updates () and one for node updates ().

**CoordAttention** uses  to perform attention-weighted updates on the multi-set coordinates. It first computes normalized displacement vectors between atoms:

Attention weights are obtained via softmax over , followed by a weighted sum:

A variance-preserving update (VPA) is applied to stabilize training:

**NodeAttention** aggregates edge messages via multi-head attention to update node features. The node features are projected into multi-head space, and the attention scores are derived from :

Similarly, VPA is applied:

Through stacking multiple such layers, the model progressively integrates geometric and chemical information, enabling refined prediction of TS structures.

**Output layer.** As shown in Equation (10), the output layer projects and combines the multiple coordinate sets into a single structure and predicts the average velocity  over the time interval :

The entire architecture preserves SE(3) equivariance, ensuring that predictions are invariant to rotations and translations of the input coordinates, making TSGen a robust and geometrically consistent model for transition-state prediction.

**A3. PathNet for reaction path generation .**

The **PathNet** module in SOT-RM is designed to generate a full reaction path connecting reactants and products. Its denoising model  takes as input the merged reactant–product hypergraph , the noisy trajectory coordinates , normalized time , step size , atom count , and atom mask . Atomic types, atom counts s, the time parameters t and time interval d are first embedded and concatenated. To encode temporal order along the trajectory, a learnable frame position embedding is added to each atom’s feature vector:

where T=10 in practice. If user provided the 3d conformation of reactant and product, T=12. The embedded features are then passed through a stack of **Equivariant Spatio‑Temporal Layers**, each processing information across both spatial (intra‑frame) and temporal (inter‑frame) dimensions.

Each **Equivariant Spatio‑Temporal Layer** consists of four main sub‑modules, executed in sequence after initial feature normalization:

**Temporal block.** The temporal block updates node features and coordinates by capturing dependencies across frames while preserving SE(3) equivariance.

1. **Temporal Node Attention** employs multi‑head attention across the frame dimension to model inter‑frame node interactions:

where  is the node feature tensor.

1. **Equivariant Trajectory MLP** updates the coordinate sets  in an SE(3)-equivariant manner. It first projects node features and coordinates into a shared latent space, then performs a low‑rank bilinear interaction between invariant node features and coordinate norms:

where  are low‑rank projections and  denotes element‑wise multiplication. The output is obtained by scaling the projected coordinates with the learned attention weights:

ensuring that the update is rotation‑equivariant.

**Spatial block.** The spatial block performs parallel message‑passing within each frame and aggregates global context across frames.

1. **Spatial Message Passing** applies a standard equivariant graph attention layer independently to each frame, with parameters shared across frames. For each frame :

where  are edge features in *s*th frame. Variance‑preserving updates (VPA) are applied to stabilize training.

1. **Global Context Message Passing Layer** aggregates information across frames through a weighted reduction and global attention, modulated by per‑frame gating. First, frame‑wise weights are learned via a softmax over a learned projection:

Global messages are then computed using the aggregated features and the multi‑frame geometry:

The resulting global updates are modulated by a per‑frame gating mechanism:

This allows the model to inject globally consistent structural information while retaining frame‑specific variations.

**Feed‑forward refinement.** After the spatial and global updates, the outputs are further refined through two feed‑forward modules:

1. **Trajectory Node FeedForward** processes node features and coordinates jointly, incorporating coordinate lengths as invariant inputs:
2. **Edge FeedForward** applies a simple MLP to edge features to enhance their representational capacity:

Residual connections are applied throughout the layer to facilitate gradient flow:

After processing through multiple such layers, the model projects the multi‑set hidden representations back to the original trajectory dimensions and outputs the average velocity  over the time interval , as defined in Eq. (11):

This velocity field is used to update the noisy trajectory toward a chemically plausible reaction path. The entire architecture preserves **SE(3) equivariance** throughout, ensuring that predictions are invariant to rotations and translations of the input coordinates, making TrajGen a robust and geometrically consistent model for reaction‑path generation.

**A4. Additional results.**

**Table S1.** Performance of SOT-RM on RGD1-XTB datasets.

| RGD1-XTB |  | (Å) | | (Å) | | (kcal/mol) | | Accuracy  (  <1.58kcal/mol) |
| --- | --- | --- | --- | --- | --- | --- | --- | --- |
| Mean | Median | Mean | Median | Mean | Median |
| SOT-RM | 1 | 0.057 | 0.038 | 0.0828 | 0.0729 | 1.02 | 0.426 | 88.0% |
| 4 | **0.056** | **0.034** | - | - | 0.827 | 0.244 | 92.42% |

**Table S2.** The performance of SOT-RM on Transition1x without DFT optimized inputs.

| Training Set | Methods |  |  | |  | | Accuracy  (  <1.58kcal/mol) |
| --- | --- | --- | --- | --- | --- | --- | --- |
| Mean | Median | Mean | Median |
| Transition1x | xTB CI-NEB40 | 1 | 0.312 | 0.179 | 10.426 | 2.673 | - |
| AEFMa,40 | 1 | 0.250 | 0.119 | 6.204 | 1.090 | - |
| React-OTb,40 | 1 | 0.211 | 0.108 | 4.697 | 1.186 | - |
| AEFMc,40 | 1 | 0.214 | 0.102 | 4.153 | 0.824 | - |
| SOT-RMb | 1 | 0.107 | 0.057 | 5.183 | 1.47 | 52.46% |
| 4 | **0.106** | **0.055** | 4.89 | 1.295 | 54.89% |
| SOT-RMd | 1 | 0.113 | 0.052 | 3.68 | 0.967 | 59.9% |
| 4 | **0.111** | **0.050** | **3.23** | **0.77** | **64.3%** |
| RGD1-XTB (Pretraining)  +  Transition1x  (Fine tune) | React-OTb,38 | 1 | 0.1056 | 0.0487 | 3.283 | 0.787 | 68.7% |
| SOT-RMb | 1 | 0.0965 | 0.038 | 3.502 | 0.607 | 73.8% |
| 4 | **0.0943** | **0.0358** | 3.22 | 0.408 | 78.28% |
| SOT-RMd | 1 | 0.098 | 0.0378 | 2.43 | 0.64 | 71.0% |
| 4 | **0.098** | **0.0374** | **2.01** | **0.42** | **77.47%** |

Note: a AEFM takes the TS predictions with xTB CI-NEB as inputs.

bReact-OT and SOT-RM takes 3D structure of reactant and product as inputs. The 3D structures were reoptimzed at xTB level.

c AEFM takes React-OT TS predictions as inputs.

dSOT-RM only takes the 3D structure of reactant and 2D graph of product as inputs. The 3D structure of reactant was reoptimized at MMFF94 level with Rdkit.

**Table S3.** The TS prediction performance of SOT-RM on Transition1x with different inference steps.

|  | RMSD (Å) | | (kcal/mol) | | Chem. Acc. | Inference time (s/reaction) |
| --- | --- | --- | --- | --- | --- | --- |
| Mean | Median | Mean | Median |
| 1 | 0.088 | 0.0517 | 15.22 | 4.44 | 9.22% | 0.021 |
| 2 | 0.0861 | 0.0453 | 7.27 | 2.55 | 27.95% | 0.021 |
| 4 | 0.0799 | 0.0417 | 3.559 | 1.698 | 46.40% | 0.017 |
| 8 | 0.0803 | 0.0383 | 3.005 | 1.222 | 61.88% | 0.02 |
| 16 | 0.0796 | 0.038 | 2.26 | 0.909 | 69.90% | 0.019 |
| 32 | 0.0771 | 0.0357 | 1.895 | 0.697 | 75.90% | 0.017 |
| 64 | 0.0769 | 0.0342 | 1.885 | 0.593 | 77.16% | 0.027 |
| 128 | 0.0759 | 0.0344 | 1.816 | 0.517 | 77.91% | 0.056 |

Note. The experiments were performed with one NVIDIA GeForce5090 32G. The batchsize is set to 256.

**Table S4.** Performance of SOT-RM for TS prediction on Transition1+ datasets.

| Methods on Additional Test |  |  | |  | | With Chem ACC |
| --- | --- | --- | --- | --- | --- | --- |
| Mean | Median | Mean | Median |
| React-OT | 1 | 0.1377 | 0.0954 | 7.33 | 2.06 | 44.3% |
| SOT-RM | 1 | 0.1168 | 0.0694 | 4.46 | 1.27 | 57.17% |
| 4 | 0.1152 | 0.0627 | 3.94 | 0.994 | 64.0% |

**Table S5.** Statistics of different Reaction Type in the Transition1+ dataset and performance comparison between SOT-RM and React-OT.

| Reaction Type | Number | SOT-RM | | | React-OT | | |
| --- | --- | --- | --- | --- | --- | --- | --- |
| RMSD (Å) | (kcal/mol) | Chem. Acc. | RMSD (Å) | (kcal/mol) | Chem. Acc. |
| R1-P1 | 4,971 | 0.117 | 4.32 | 59.50% | 0.126 | 6.58 | 48.00% |
| R1-P2 | 682 | 0.148 | 4.9 | 60.00% | 0.179 | 8.22 | 40.00% |
| R1-P3 | 6 | 0.095 | 1.36 | 83.30% | 0.087 | 3.99 | 50.00% |
| R2-P1 | 753 | 0.148 | 5.26 | 49.10% | 0.175 | 7.17 | 40.60% |
| R2-P2 | 237 | 0.196 | 4.15 | 38.40% | 0.304 | 18.18 | 8.90% |
| R2-P3 | 11 | 0.291 | 2.66 | 63.60% | 0.265 | 19.32 | 9.10% |
| R3-P1 | 2 | 0.25 | 6.67 | 0.00% | 0.224 | 4.89 | 0.00% |
| R3-P2 | 13 | 0.24 | 8.58 | 23.10% | 0.313 | 22.27 | 0.00% |
| Unknown | 364 | 0.121 | 3.92 | 59.30% | 0.147 | 8.37 | 35.80% |
| Total | 7,039 | 0.127 | 4.45 | 57.70% | 0.144 | 7.33 | 44.30% |

**Table S6.** The reaction path generation performance of SOT-RM on 100 random reactions of Transition1x test set with different inference steps.

|  | (Å) | | (Å) | | Inference time (s/reaction) |
| --- | --- | --- | --- | --- | --- |
| Mean | Median | Mean | Median |
| 1 | 0.0944 | 0.0693 | 0.2362 | 0.1697 | 0.010 |
| 2 | 0.0846 | 0.05805 | 0.2006 | 0.1229 | 0.012 |
| 4 | 0.0787 | 0.05645 | 0.1901 | 0.1206 | 0.0107 |
| 8 | 0.0759 | 0.0543 | 0.1815 | 0.1071 | 0.017 |
| 16 | 0.0737 | 0.0516 | 0.1887 | 0.1187 | 0.029 |
| 32 | 0.0725 | 0.0501 | 0.182 | 0.1089 | 0.063 |
| 64 | 0.0708 | 0.0501 | 0.1771 | 0.1091 | 0.1115 |
| 128 | 0.0704 | 0.049 | 0.1709 | 0.094 | 0.212 |

Note. The experiments were performed with one NVIDIA GeForce5090 32G. The batchsize is set to 16.

**Table S7.** Reaction path generation performance of SOT-RM on Transition1x with 128 inference steps （1007 reactions）.

| Metrics | SOT-RM (from scratch) | | SOT-RM (pretrained) | |
| --- | --- | --- | --- | --- |
| Mean | Median | Mean | Median |
| (Å) | 0.08737 | 0.0701 | 0.0801 | 0.0593 |
| (Å) | 0.2183 | 0.1359 | 0.2056 | 0.1211 |
|  | 0.0424 | 0.0246 | 0.0390 | 0.0208 |
|  | 0.2455 | 0.1454 | 0.2281 | 0.1265 |
